# Supplementary material
Source: PubMed Central journal article supplement (PMC6413923)
Supplement: NIHMS82052-supplement-Supporting_Information.pdf [file NIHMS82052-supplement-Supporting_Information.pdf]

## SUPPORTING INFORMATION

### Second Generation Triple-Helical Peptide Inhibitors of Matrix Metalloproteinases

Manishabrata Bhowmick (manishabrata.bhowmick@sial.com),<sup>†,¶</sup> Dorota Tokmina-Roszyk (dtokminarosz2013@fau.edu),<sup>§</sup> Lillian Onwuha-Ekpete (lonwuhae@fau.edu),<sup>§</sup> Kelli Harmon (Kelli.Odoms@cchmc.org),<sup>¥</sup> Trista Robichaud (trista.k.robichaud@lonestar.edu),<sup>Δ</sup> Rita Fuerst (rfuerst@scripps.edu),<sup>£</sup> Roma Stawikowska (rstawikowska@fau.edu),<sup>§</sup> Bjorn Steffensen (bjorn.steffensen@tufts.edu),<sup>Δ,Ω</sup> William Roush (roush@scripps.edu),<sup>£</sup> Hector R. Wong (hector.wong@cchmc.org),<sup>¥</sup> and Gregg B. Fields (gfields@scripps.edu)<sup>\*,§,£</sup>

<sup>†</sup>Torrey Pines Institute for Molecular Studies, 11350 SW Village Parkway, Port St. Lucie, FL 34987, <sup>¶</sup>Sigma-Aldrich Corporation, 3 Strathmore Road, Natick, MA 01760, <sup>§</sup>Florida Atlantic University, 5353 Parkside Drive, Jupiter, FL 33458, <sup>¥</sup>Cincinnati Children's Hospital Medical Center, 3333 Burnet Avenue, Cincinnati, OH 45229, <sup>Δ</sup>University of Texas Health Science Center, 7703 Floyd Curl Drive, San Antonio TX 78229, <sup>£</sup>The Scripps Research Institute/Scripps Florida, 130 Scripps Way, Jupiter, FL 33458, and <sup>Ω</sup>Tufts University, School of Dental Medicine, 1 Kneeland Street, Boston, MA 02111

#### Table of Contents

|                                                                                                                                                                           |   |
|---------------------------------------------------------------------------------------------------------------------------------------------------------------------------|---|
| Figure S1. Melting curves for THPs                                                                                                                                        | 3 |
| Figure S2. CD spectra and melting curves of GlyΨ{PO <sub>2</sub> H-CH <sub>2</sub> }Ile-His-Lys-Gln THPI and GlyΨ{PO <sub>2</sub> H-CH <sub>2</sub> }Ile-Tyr-Phe-Gln THPI | 4 |

|                                                                            |   |
|----------------------------------------------------------------------------|---|
| Figure S3. Serum cytokine profiles 24 h after CLP                          | 5 |
| Figure S4. Wild-type mice bacterial colony counts in blood, 24 h after CLP | 6 |

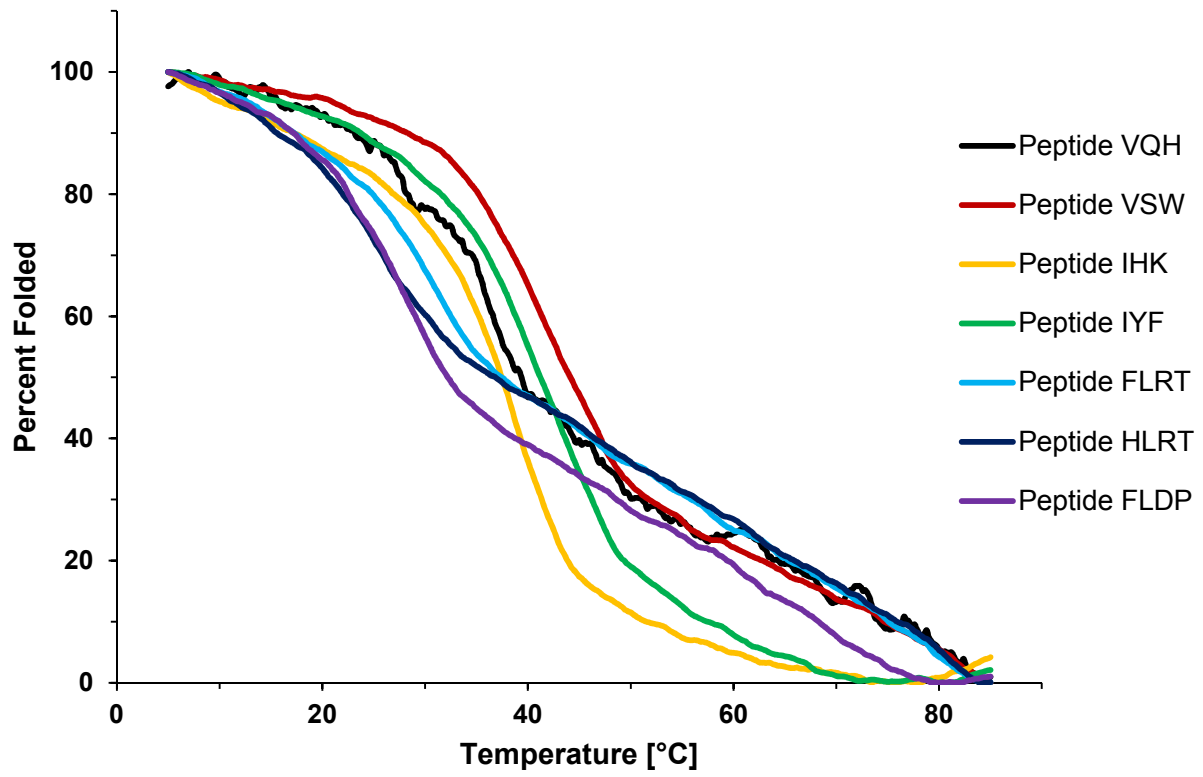

Figure S1. Melting curves for THPs.

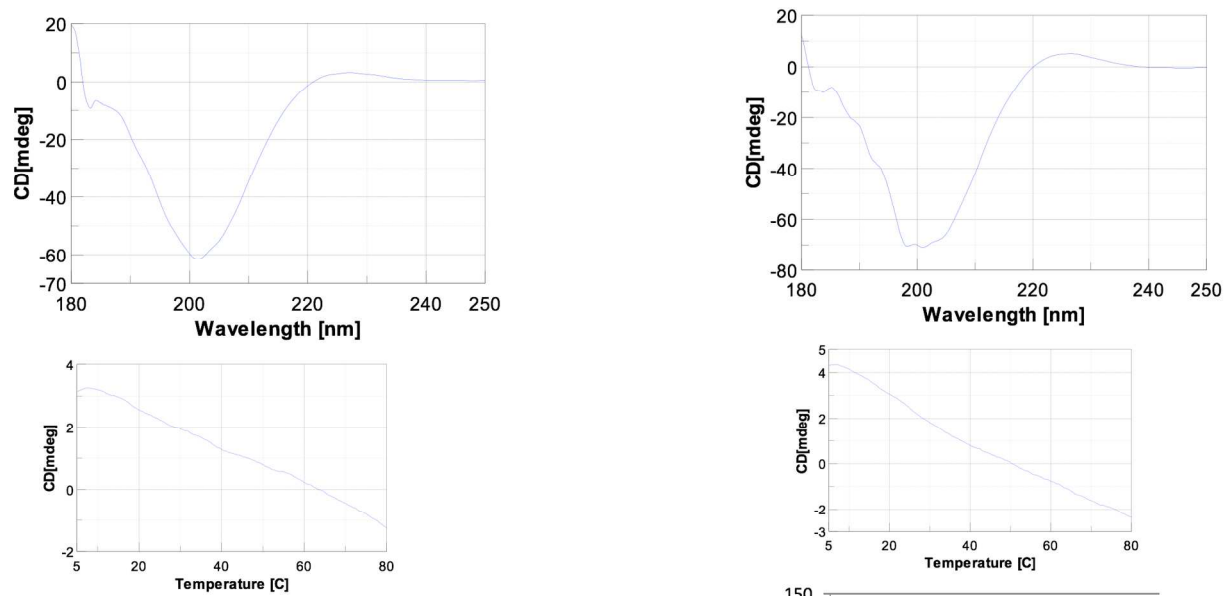

**Figure S2.** CD spectra (top) and melting curves (bottom) of Gly $\Psi$ {PO<sub>2</sub>H-CH<sub>2</sub>}Ile-His-Lys-Gln THPI (left) and Gly $\Psi$ {PO<sub>2</sub>H-CH<sub>2</sub>}Ile-Tyr-Phe-Gln THPI (right).

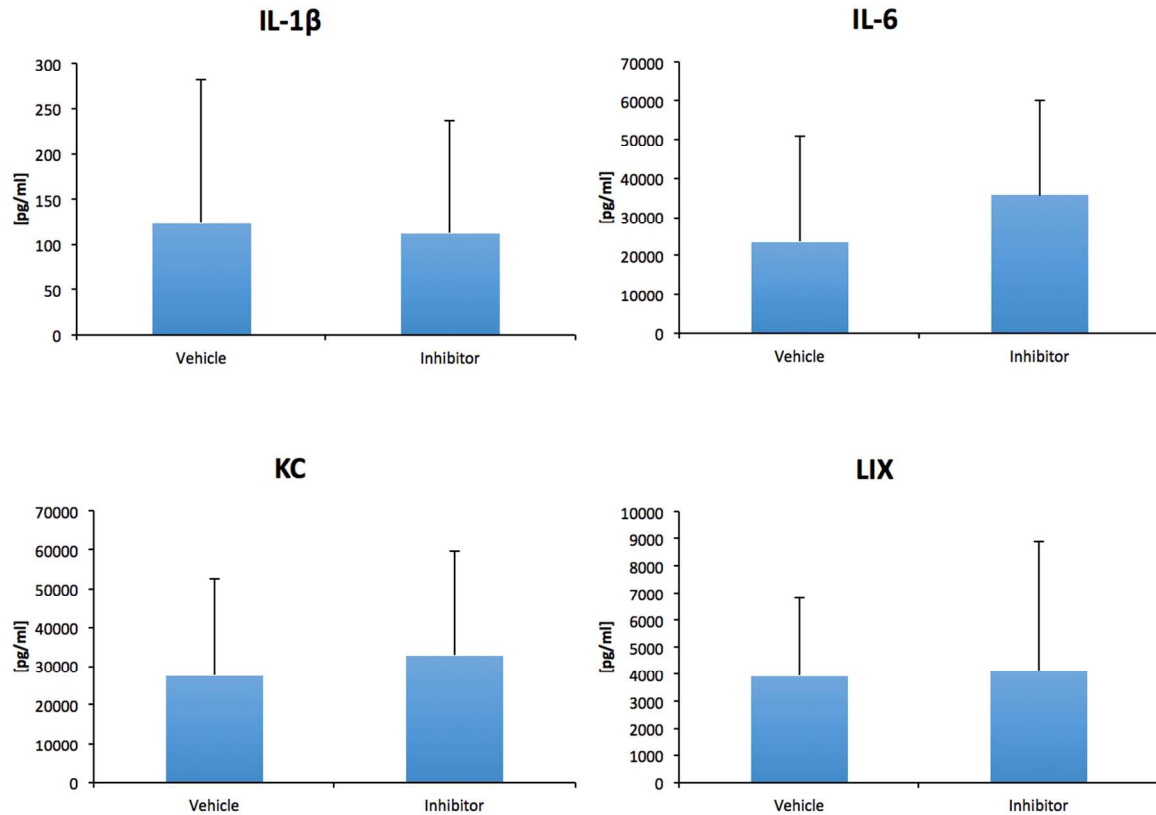

**Figure S3.** Serum cytokine profiles 24 h after CLP. One group of mice (n = 10) was treated with the Gly $\Psi$ {PO<sub>2</sub>H-CH<sub>2</sub>}Ile-His-Lys-Gln THPI (10 mg/kg) immediately after CLP then 12 h later. The other group of mice (n = 10) was treated with saline vehicle using the identical schedule. p < 0.05 versus vehicle.

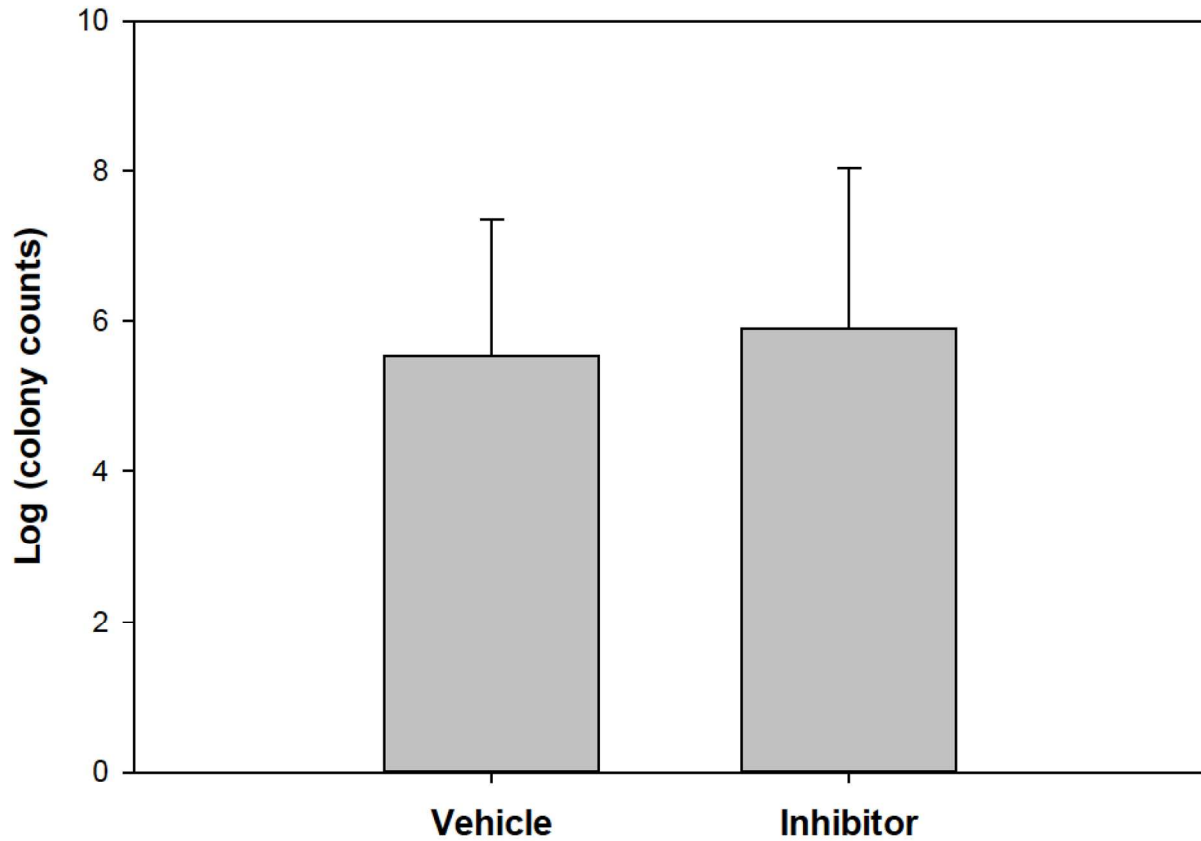

**Figure S4.** Wild-type mice bacterial colony counts in blood, 24 h after CLP. Data are shown as log transformed bacterial colony counts. One group of mice (n = 5) was treated with the Gly $\Psi$ {PO<sub>2</sub>H-CH<sub>2</sub>}Ile-His-Lys-Gln THPI (10 mg/kg) immediately after CLP and then 12 h later. The other group of mice (n = 5) was treated with saline vehicle using the identical schedule. p < 0.404.
